# Supplementary material for: Female reproductive status and ecological conditions impact the magnitude of sex differences in human immune status across the lifespan
Source: Research Square preprint supplement (doi:10.21203/rs.3.rs-9510862/v1), 2026-05-18
Supplement: Supplementary file 1 [file aae9df89e45144814752ac35.docx]

## Supplementary Information

### Figures


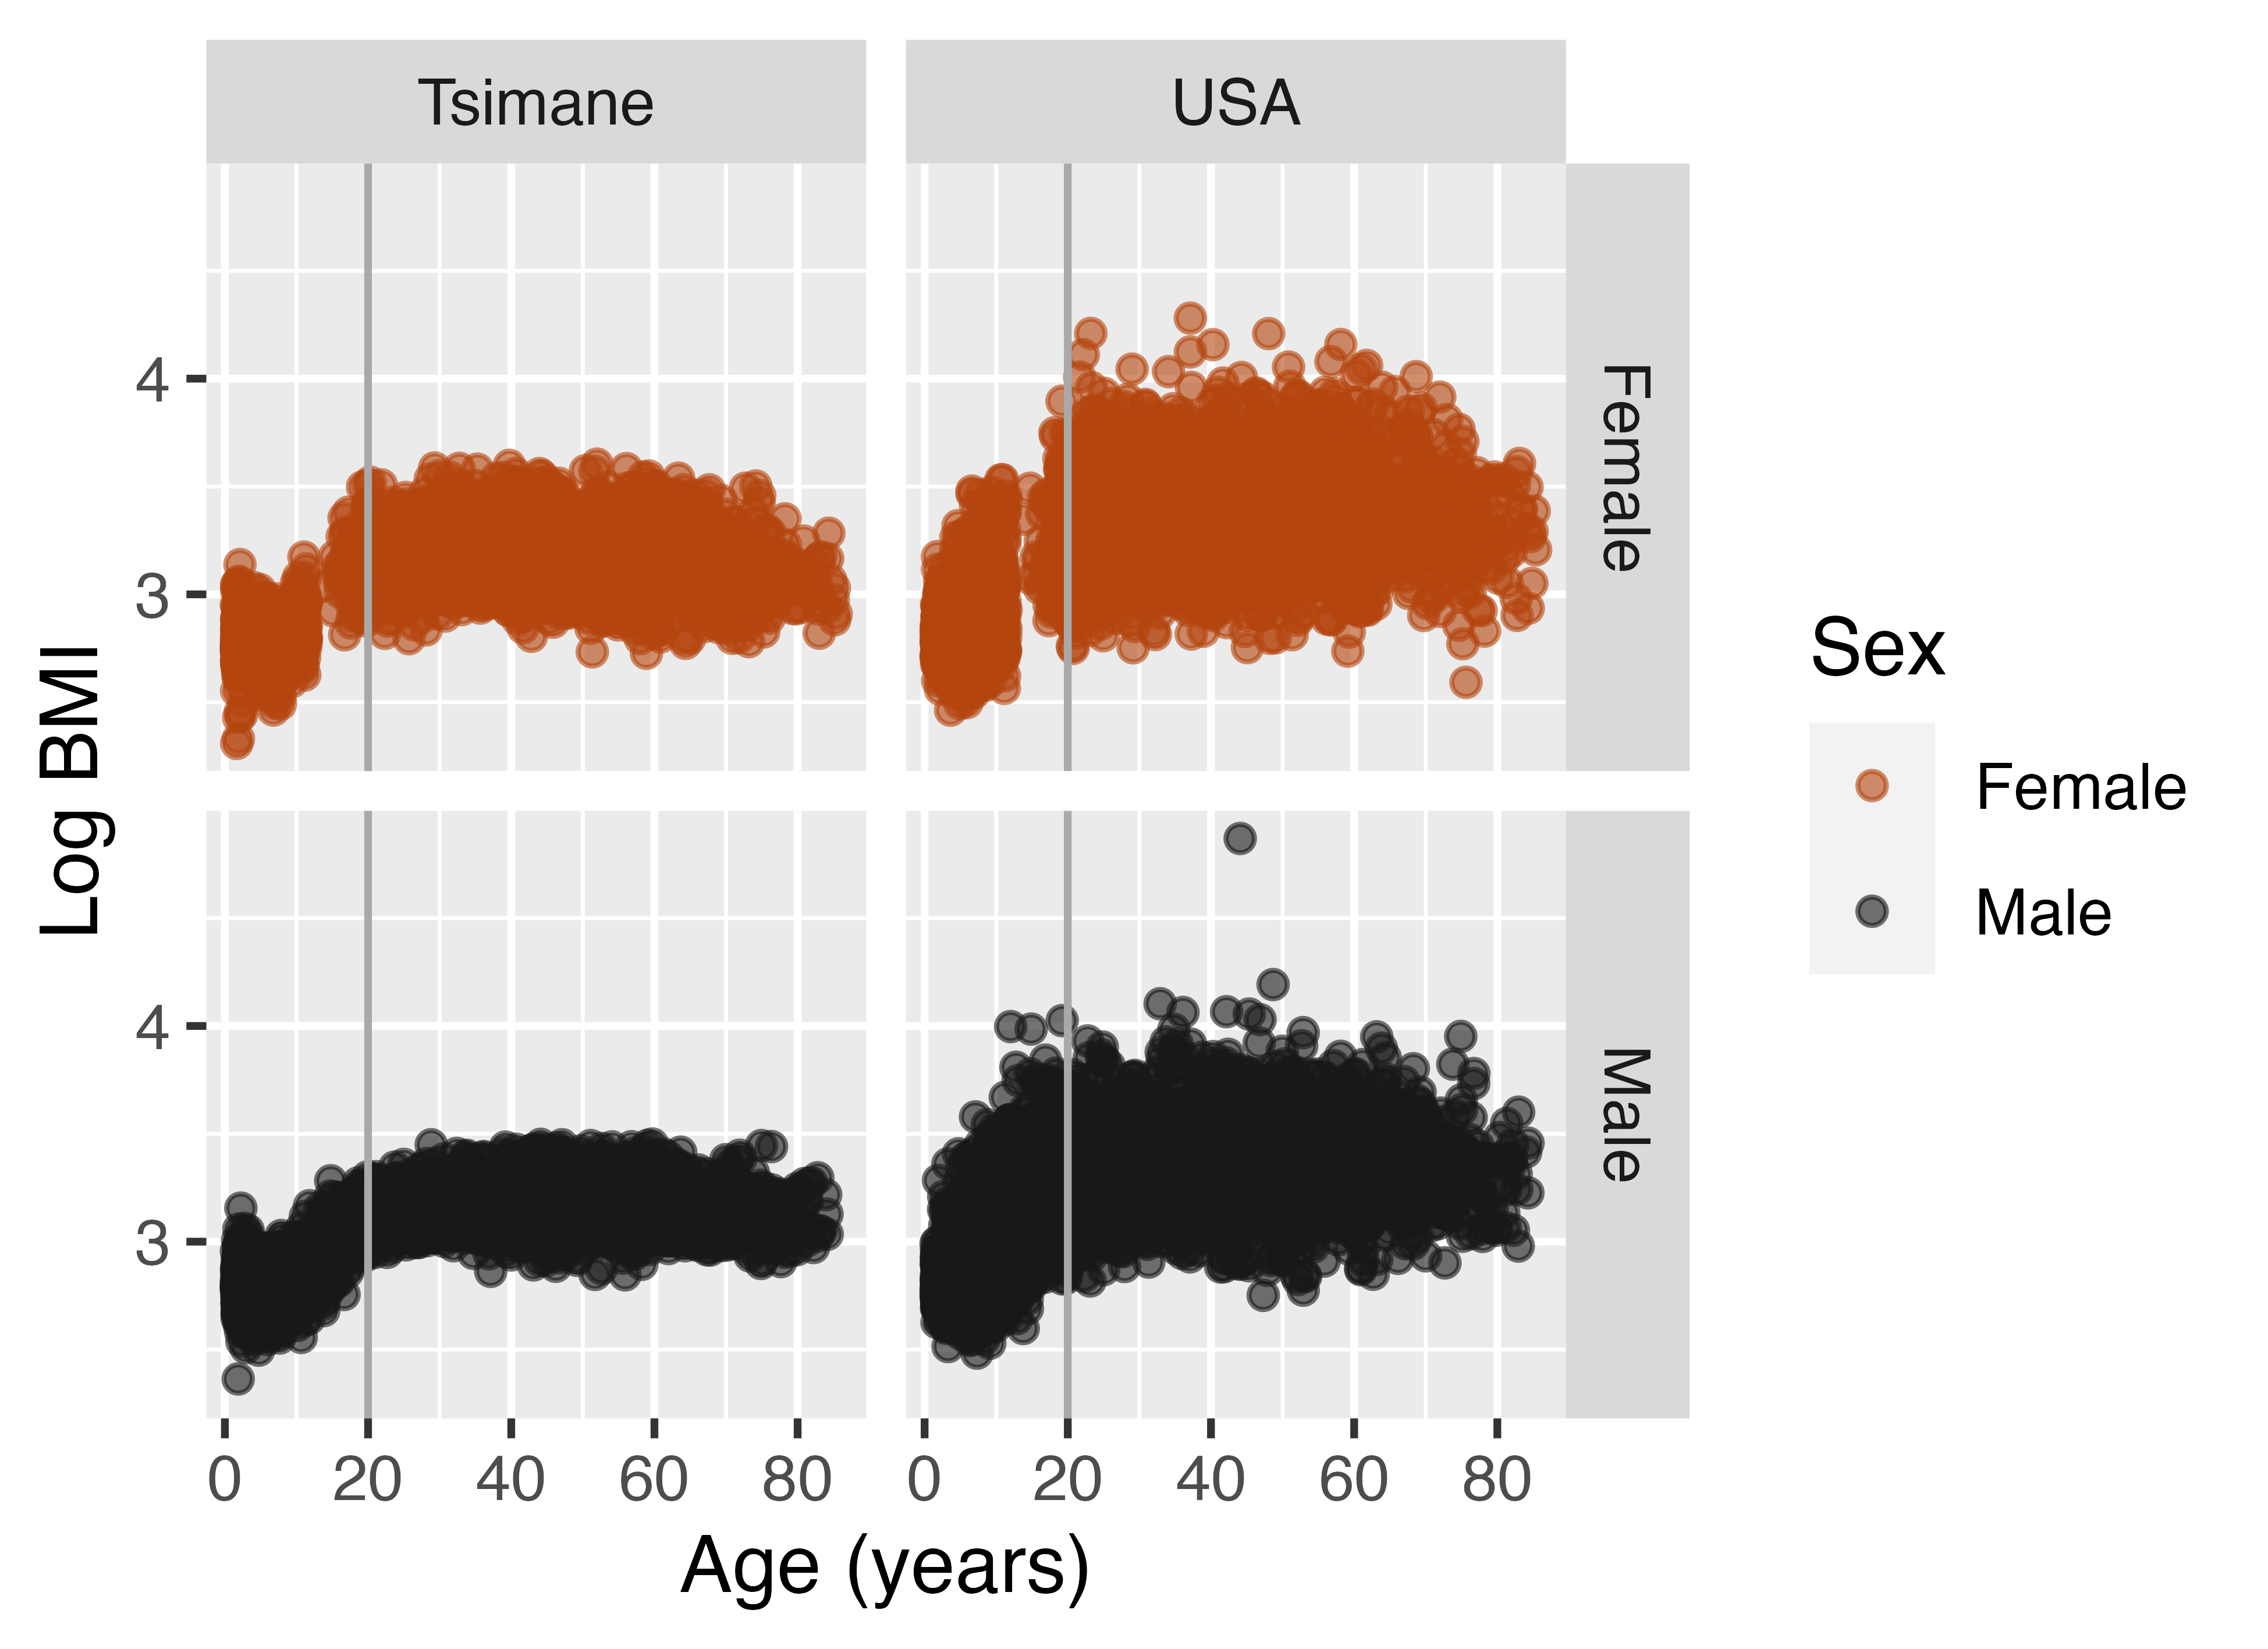


Fig S1. Raw natural logged body mass index (BMI) values by age and sex among the Tsimane and in the USA.


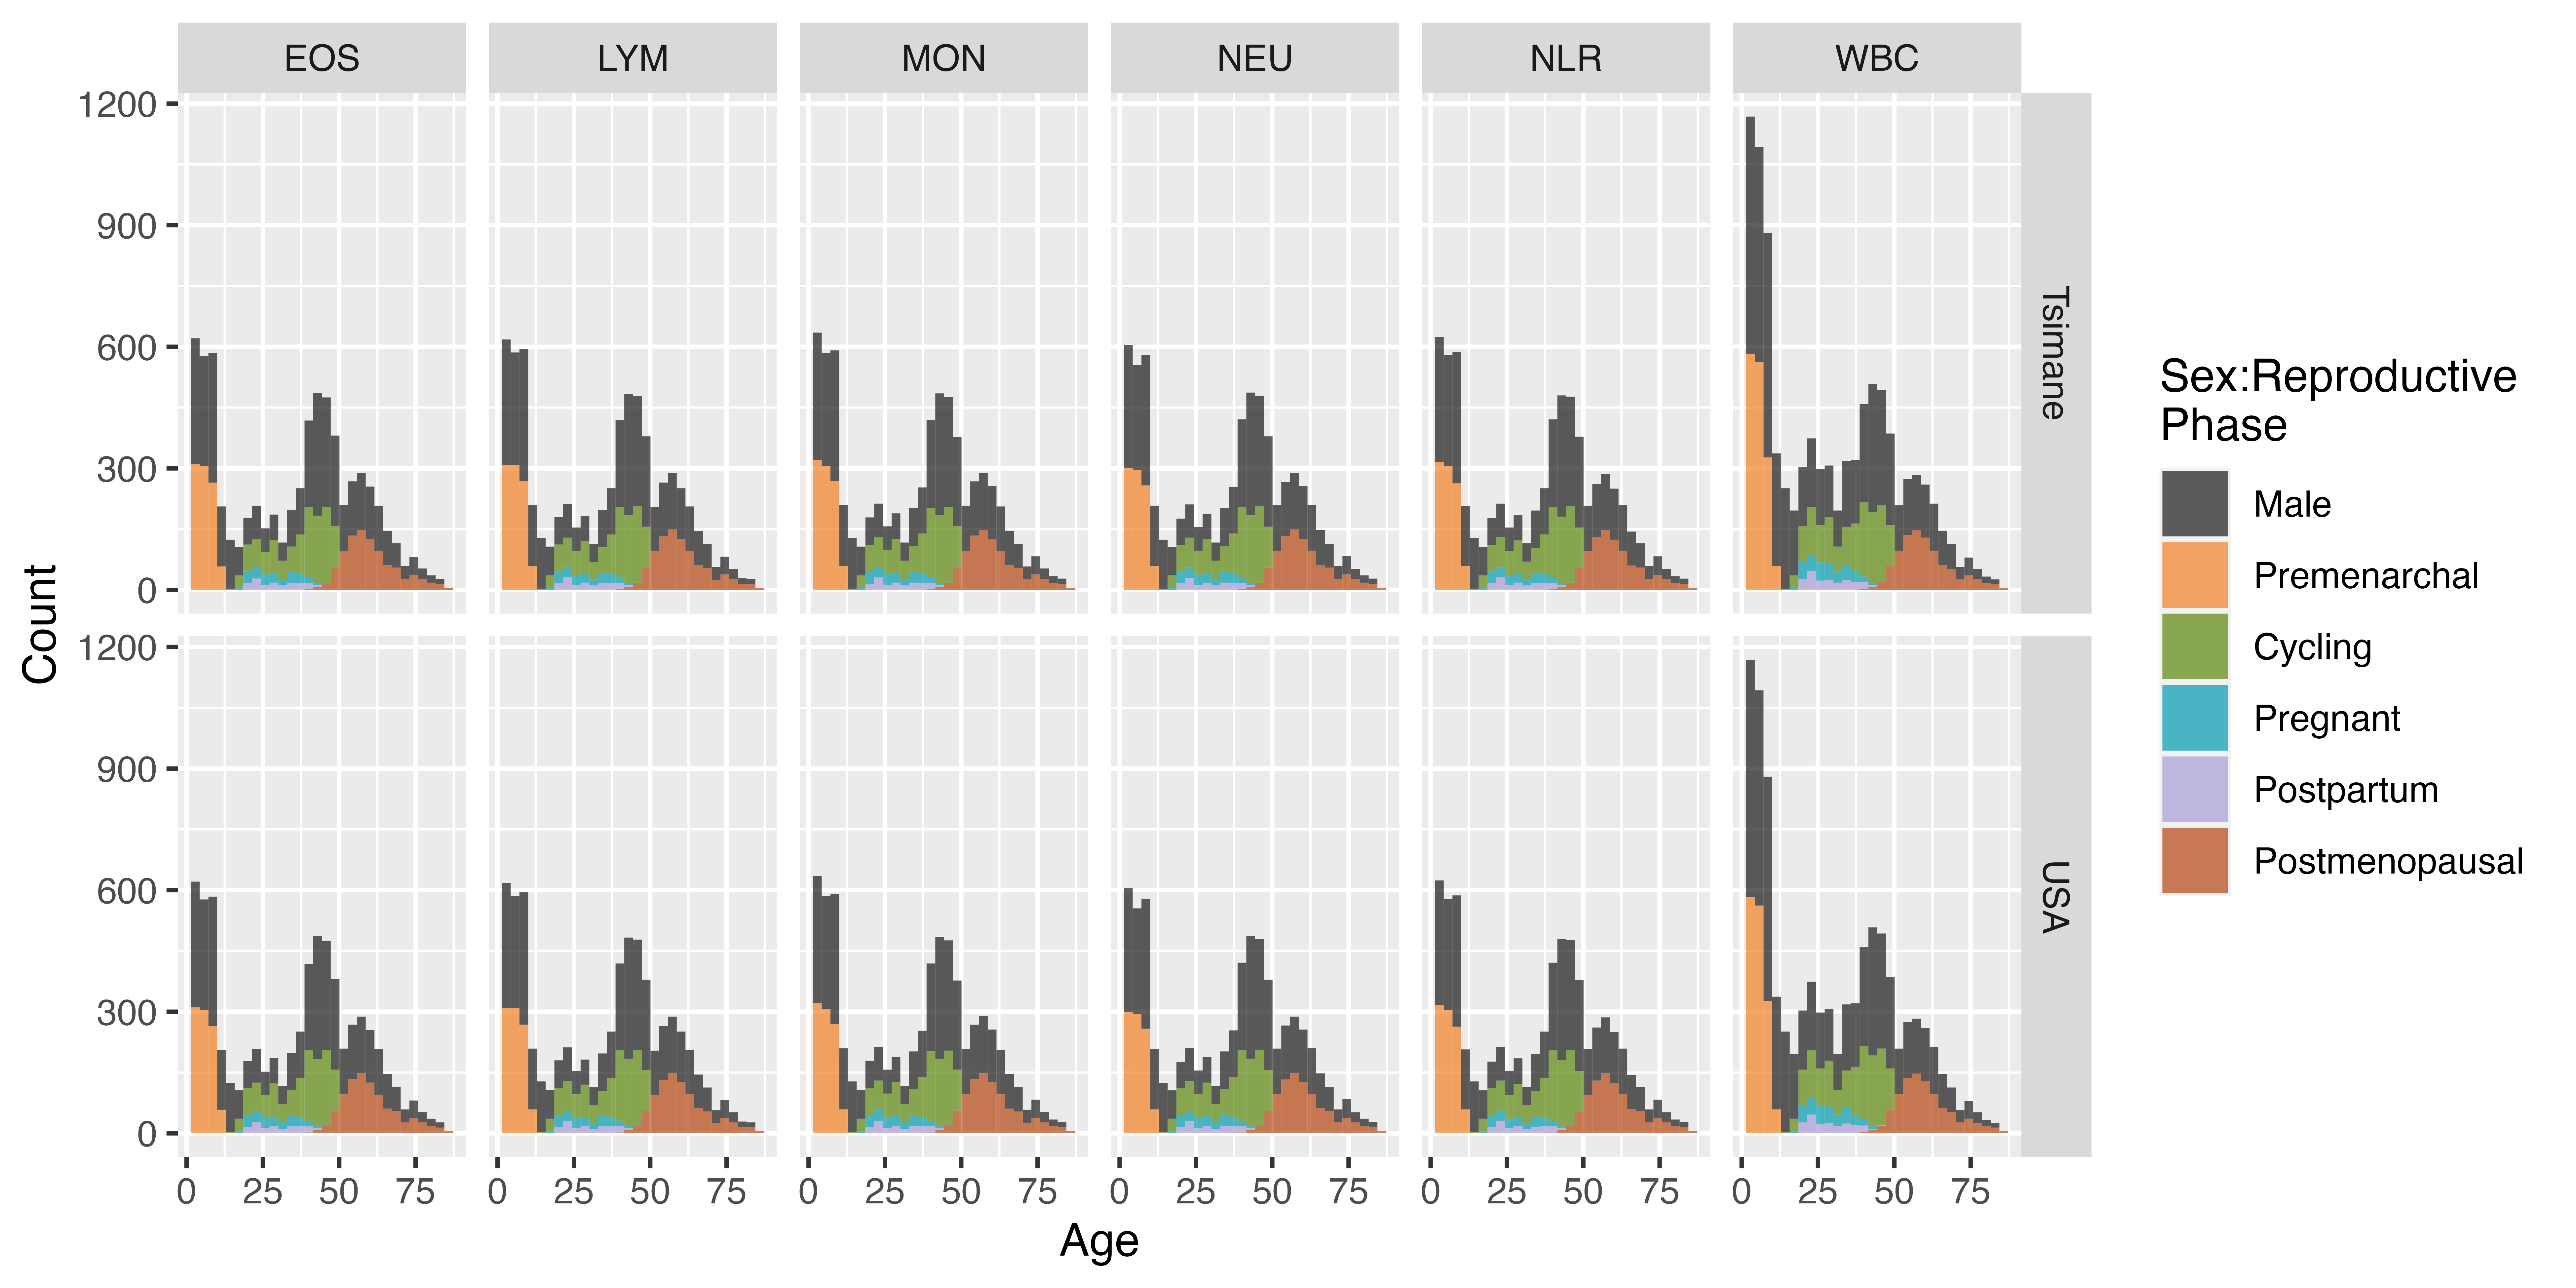


Fig S2. Final matched sample sizes by measure, population, age, and sex:female reproductive phase.

### Tables

Table S1. Final matched sample sizes by measure, population, and sex:female reproductive phase.

| Measure | Population | Male | Premenarchal | Cycling | Pregnant | Postpartum | Postmenopausal |
| --- | --- | --- | --- | --- | --- | --- | --- |
| WBC | Tsimane | 5320 | 1531 | 1365 | 286 | 203 | 934 |
| WBC | USA | 5320 | 1531 | 1365 | 286 | 203 | 934 |
| NEU | Tsimane | 3669 | 912 | 1154 | 194 | 141 | 931 |
| NEU | USA | 3669 | 912 | 1154 | 194 | 141 | 931 |
| LYM | Tsimane | 3673 | 945 | 1149 | 184 | 142 | 923 |
| LYM | USA | 3673 | 945 | 1149 | 184 | 142 | 923 |
| NLR | Tsimane | 3678 | 943 | 1146 | 186 | 140 | 919 |
| NLR | USA | 3678 | 943 | 1146 | 186 | 140 | 919 |
| MON | Tsimane | 3701 | 955 | 1151 | 195 | 142 | 927 |
| MON | USA | 3701 | 955 | 1151 | 195 | 142 | 927 |
| EOS | Tsimane | 3678 | 939 | 1144 | 192 | 139 | 926 |
| EOS | USA | 3678 | 939 | 1144 | 192 | 139 | 926 |

Table S2. Number and corresponding percentage of unique participants out of the total THLHP sample by measure and sex:female reproductive phase.

| Measure | Male | Premenarchal | Cycling | Pregnant | Postpartum | Postmenopausal |
| --- | --- | --- | --- | --- | --- | --- |
| WBC | 3181 (59.79%) | 1193 (77.92%) | 848 (62.12%) | 258 (90.21%) | 195 (96.06%) | 375 (40.15%) |
| NEU | 2038 (55.55%) | 721 (79.06%) | 712 (61.7%) | 179 (92.27%) | 140 (99.29%) | 373 (40.06%) |
| LYM | 2052 (55.87%) | 736 (77.88%) | 711 (61.88%) | 169 (91.85%) | 141 (99.3%) | 371 (40.2%) |
| NLR | 2052 (55.79%) | 735 (77.94%) | 708 (61.78%) | 172 (92.47%) | 139 (99.29%) | 372 (40.48%) |
| MON | 2057 (55.58%) | 741 (77.59%) | 713 (61.95%) | 180 (92.31%) | 141 (99.3%) | 372 (40.13%) |
| EOS | 2043 (55.55%) | 728 (77.53%) | 706 (61.71%) | 177 (92.19%) | 138 (99.28%) | 372 (40.17%) |

Table S3. Ages and values at which the absolute difference in immune outcomes between females and their male counterparts is greatest, separated by female reproductive phase, population, and immune measure.

| Pop | Measure | Reproductive Phase | Age | Parity | Bias | Female Value | Male Value | Percent Difference |
| --- | --- | --- | --- | --- | --- | --- | --- | --- |
| Tsimane | LYM | Premenarchal | 2 | 0 | Male | 5718 cells/µl (95% CI: 5565-5871) | 6107 cells/µl (95% CI: 5950-6265) | 6% (95% CI: 4%, 9%) |
| Tsimane | MON | Premenarchal | 11 | 0 | Female | 79 cells/µl (95% CI: 66-92) | 58 cells/µl (95% CI: 50-65) | 37% (95% CI: 15%, 59%) |
| USA | LYM | Premenarchal | 2 | 0 | Female | 3880 cells/µl (95% CI: 3775-3986) | 3533 cells/µl (95% CI: 3445-3620) | 10% (95% CI: 7%, 13%) |
| USA | EOS | Premenarchal | 2 | 0 | Male | 218 cells/µl (95% CI: 200-236) | 262 cells/µl (95% CI: 249-275) | 17% (95% CI: 10%, 24%) |
| USA | MON | Premenarchal | 7 | 0 | Male | 535 cells/µl (95% CI: 518-552) | 592 cells/µl (95% CI: 580-603) | 10% (95% CI: 7%, 12%) |
| Tsimane | WBC | Cycling | 14 | 3 | Male | 10682 cells/µl (95% CI: 10184-11180) | 12229 cells/µl (95% CI: 12024-12434) | 13% (95% CI: 9%, 17%) |
| Tsimane | NEU | Cycling | 16 | 3 | Male | 5285 cells/µl (95% CI: 4943-5626) | 5983 cells/µl (95% CI: 5785-6181) | 12% (95% CI: 6%, 17%) |
| Tsimane | LYM | Cycling | 14 | 3 | Male | 3225 cells/µl (95% CI: 3009-3441) | 3835 cells/µl (95% CI: 3718-3952) | 16% (95% CI: 10%, 22%) |
| Tsimane | EOS | Cycling | 14 | 3 | Male | 1603 cells/µl (95% CI: 1378-1828) | 2216 cells/µl (95% CI: 2112-2321) | 28% (95% CI: 18%, 38%) |
| Tsimane | NLR | Cycling | 14 | 3 | Female | 1.99 ratio (95% CI: 1.77-2.21) | 1.69 ratio (95% CI: 1.62-1.76) | 18% (95% CI: 5%, 31%) |
| USA | WBC | Cycling | 14 | 3 | Female | 7608 cells/µl (95% CI: 7296-7921) | 6768 cells/µl (95% CI: 6647-6888) | 12% (95% CI: 8%, 17%) |
| USA | NEU | Cycling | 14 | 3 | Female | 4249 cells/µl (95% CI: 3976-4522) | 3630 cells/µl (95% CI: 3511-3750) | 17% (95% CI: 10%, 25%) |
| USA | EOS | Cycling | 14 | 3 | Male | 207 cells/µl (95% CI: 179-235) | 246 cells/µl (95% CI: 237-255) | 16% (95% CI: 4%, 27%) |
| USA | MON | Cycling | 26 | 3 | Male | 507 cells/µl (95% CI: 482-532) | 598 cells/µl (95% CI: 577-618) | 15% (95% CI: 11%, 19%) |
| USA | NLR | Cycling | 49 | 3 | Female | 2.22 ratio (95% CI: 2.14-2.31) | 2.05 ratio (95% CI: 2-2.11) | 8% (95% CI: 4%, 12%) |
| Tsimane | WBC | Pregnant | 17 | 3 | Male | 10578 cells/µl (95% CI: 9631-11524) | 11862 cells/µl (95% CI: 11637-12088) | 11% (95% CI: 3%, 19%) |
| Tsimane | LYM | Pregnant | 21 | 3 | Male | 2837 cells/µl (95% CI: 2520-3154) | 3641 cells/µl (95% CI: 3481-3801) | 22% (95% CI: 13%, 31%) |
| Tsimane | EOS | Pregnant | 30 | 3 | Male | 1307 cells/µl (95% CI: 1034-1580) | 1770 cells/µl (95% CI: 1625-1914) | 26% (95% CI: 11%, 42%) |
| Tsimane | NLR | Pregnant | 31 | 3 | Female | 2.43 ratio (95% CI: 2.22-2.65) | 1.79 ratio (95% CI: 1.7-1.88) | 36% (95% CI: 24%, 48%) |
| USA | WBC | Pregnant | 30 | 3 | Female | 8908 cells/µl (95% CI: 8514-9302) | 7357 cells/µl (95% CI: 7185-7528) | 21% (95% CI: 16%, 26%) |
| USA | NEU | Pregnant | 29 | 3 | Female | 6003 cells/µl (95% CI: 5584-6422) | 4270 cells/µl (95% CI: 4116-4425) | 41% (95% CI: 31%, 50%) |
| USA | LYM | Pregnant | 38 | 3 | Male | 1946 cells/µl (95% CI: 1763-2130) | 2242 cells/µl (95% CI: 2176-2308) | 13% (95% CI: 5%, 21%) |
| USA | EOS | Pregnant | 17 | 3 | Male | 161 cells/µl (95% CI: 103-218) | 241 cells/µl (95% CI: 231-251) | 33% (95% CI: 9%, 57%) |
| USA | NLR | Pregnant | 29 | 3 | Female | 3.14 ratio (95% CI: 2.9-3.38) | 2 ratio (95% CI: 1.92-2.09) | 57% (95% CI: 45%, 69%) |
| Tsimane | MON | Postpartum | 47 | 3 | Female | 239 cells/µl (95% CI: 113-365) | 65 cells/µl (95% CI: 58-72) | 266% (95% CI: 73%, 460%) |
| USA | MON | Postpartum | 24 | 3 | Male | 488 cells/µl (95% CI: 442-535) | 603 cells/µl (95% CI: 582-623) | 19% (95% CI: 11%, 27%) |
| Tsimane | EOS | Postmenopausal | 59 | 3 | Female | 1864 cells/µl (95% CI: 1730-1998) | 1608 cells/µl (95% CI: 1492-1724) | 16% (95% CI: 8%, 24%) |
| Tsimane | NLR | Postmenopausal | 84 | 3 | Male | 2.02 ratio (95% CI: 1.76-2.28) | 2.61 ratio (95% CI: 2.29-2.93) | 23% (95% CI: 13%, 32%) |
| USA | NEU | Postmenopausal | 58 | 3 | Male | 3861 cells/µl (95% CI: 3733-3990) | 4151 cells/µl (95% CI: 4029-4273) | 7% (95% CI: 4%, 10%) |
| USA | LYM | Postmenopausal | 53 | 3 | Female | 2294 cells/µl (95% CI: 2230-2357) | 2064 cells/µl (95% CI: 2002-2127) | 11% (95% CI: 8%, 14%) |
| USA | EOS | Postmenopausal | 75 | 3 | Male | 187 cells/µl (95% CI: 170-204) | 224 cells/µl (95% CI: 205-243) | 16% (95% CI: 9%, 24%) |
| USA | MON | Postmenopausal | 83 | 3 | Male | 571 cells/µl (95% CI: 541-601) | 670 cells/µl (95% CI: 604-736) | 15% (95% CI: 10%, 19%) |
| USA | NLR | Postmenopausal | 83 | 3 | Male | 2.3 ratio (95% CI: 2.04-2.57) | 2.84 ratio (95% CI: 2.59-3.1) | 19% (95% CI: 10%, 28%) |

Table S4. Model terms, statistics, and p-values for Tsimane-specific models.

| Population | Measure | Term | RepPhase | EDF | F-statistic | P-value | Sex:Reproductive Phase |
| --- | --- | --- | --- | --- | --- | --- | --- |
| Tsimane | WBC | s(Age) | Cycling | 1.022 | 9.138 | 0.003 | Cycling |
| Tsimane | WBC | s(Age) | Male | 5.294 | 184.778 | <0.001 | Male |
| Tsimane | WBC | s(Age) | Postmenopausal | 1.030 | 8.204 | 0.004 | Postmenopausal |
| Tsimane | WBC | s(Age) | Postpartum | 1.157 | 1.852 | 0.087 | Postpartum |
| Tsimane | WBC | s(Age) | Premenarchal | 1.019 | 0.008 | 0.972 | Premenarchal |
| Tsimane | WBC | s(Age) | Pregnant | 1.112 | 0.753 | 0.388 | Pregnant |
| Tsimane | WBC | s(Parity) | Cycling | 1.814 | 0.557 | 0.557 | Cycling |
| Tsimane | WBC | s(Parity) | Postmenopausal | 1.018 | 2.117 | 0.152 | Postmenopausal |
| Tsimane | WBC | s(Parity) | Postpartum | 1.015 | 1.756 | 0.187 | Postpartum |
| Tsimane | WBC | s(Parity) | Pregnant | 1.154 | 0.199 | 0.838 | Pregnant |
| Tsimane | NEU | s(Age) | Cycling | 1.083 | 3.034 | 0.085 | Cycling |
| Tsimane | NEU | s(Age) | Male | 6.484 | 18.196 | <0.001 | Male |
| Tsimane | NEU | s(Age) | Postmenopausal | 1.015 | 2.209 | 0.136 | Postmenopausal |
| Tsimane | NEU | s(Age) | Postpartum | 1.002 | 7.355 | 0.007 | Postpartum |
| Tsimane | NEU | s(Age) | Premenarchal | 1.774 | 19.409 | <0.001 | Premenarchal |
| Tsimane | NEU | s(Age) | Pregnant | 1.760 | 3.607 | 0.025 | Pregnant |
| Tsimane | NEU | s(Parity) | Cycling | 2.191 | 1.521 | 0.206 | Cycling |
| Tsimane | NEU | s(Parity) | Postmenopausal | 1.014 | 1.894 | 0.175 | Postmenopausal |
| Tsimane | NEU | s(Parity) | Postpartum | 1.005 | 0.767 | 0.382 | Postpartum |
| Tsimane | NEU | s(Parity) | Pregnant | 1.002 | 0.001 | 0.991 | Pregnant |
| Tsimane | LYM | s(Age) | Cycling | 1.013 | 4.059 | 0.045 | Cycling |
| Tsimane | LYM | s(Age) | Male | 7.946 | 266.968 | <0.001 | Male |
| Tsimane | LYM | s(Age) | Postmenopausal | 1.011 | 6.778 | 0.008 | Postmenopausal |
| Tsimane | LYM | s(Age) | Postpartum | 1.012 | 2.493 | 0.113 | Postpartum |
| Tsimane | LYM | s(Age) | Premenarchal | 1.010 | 37.483 | <0.001 | Premenarchal |
| Tsimane | LYM | s(Age) | Pregnant | 2.089 | 2.836 | 0.043 | Pregnant |
| Tsimane | LYM | s(Parity) | Cycling | 1.008 | 0.223 | 0.644 | Cycling |
| Tsimane | LYM | s(Parity) | Postmenopausal | 1.377 | 0.146 | 0.803 | Postmenopausal |
| Tsimane | LYM | s(Parity) | Postpartum | 1.010 | 0.089 | 0.786 | Postpartum |
| Tsimane | LYM | s(Parity) | Pregnant | 1.007 | 0.121 | 0.735 | Pregnant |
| Tsimane | EOS | s(Age) | Cycling | 1.027 | 0.013 | 0.972 | Cycling |
| Tsimane | EOS | s(Age) | Male | 7.829 | 22.199 | <0.001 | Male |
| Tsimane | EOS | s(Age) | Postmenopausal | 1.021 | 0.116 | 0.766 | Postmenopausal |
| Tsimane | EOS | s(Age) | Postpartum | 1.010 | 0.647 | 0.421 | Postpartum |
| Tsimane | EOS | s(Age) | Premenarchal | 1.873 | 9.796 | <0.001 | Premenarchal |
| Tsimane | EOS | s(Age) | Pregnant | 2.136 | 6.268 | 0.002 | Pregnant |
| Tsimane | EOS | s(Parity) | Cycling | 5.188 | 3.434 | 0.002 | Cycling |
| Tsimane | EOS | s(Parity) | Postmenopausal | 1.007 | 9.941 | 0.002 | Postmenopausal |
| Tsimane | EOS | s(Parity) | Postpartum | 1.330 | 0.716 | 0.348 | Postpartum |
| Tsimane | EOS | s(Parity) | Pregnant | 1.057 | 0.009 | 0.987 | Pregnant |
| Tsimane | MON | s(Age) | Cycling | 1.054 | 4.411 | 0.043 | Cycling |
| Tsimane | MON | s(Age) | Male | 5.716 | 8.299 | <0.001 | Male |
| Tsimane | MON | s(Age) | Postmenopausal | 3.058 | 2.111 | 0.114 | Postmenopausal |
| Tsimane | MON | s(Age) | Postpartum | 3.306 | 4.492 | 0.001 | Postpartum |
| Tsimane | MON | s(Age) | Premenarchal | 1.001 | 0.048 | 0.826 | Premenarchal |
| Tsimane | MON | s(Age) | Pregnant | 1.008 | 2.109 | 0.147 | Pregnant |
| Tsimane | MON | s(Parity) | Cycling | 1.007 | 0.008 | 0.956 | Cycling |
| Tsimane | MON | s(Parity) | Postmenopausal | 1.005 | 0.318 | 0.576 | Postmenopausal |
| Tsimane | MON | s(Parity) | Postpartum | 2.206 | 2.434 | 0.159 | Postpartum |
| Tsimane | MON | s(Parity) | Pregnant | 1.004 | 0.053 | 0.825 | Pregnant |
| Tsimane | NLR | s(Age) | Cycling | 2.210 | 1.396 | 0.242 | Cycling |
| Tsimane | NLR | s(Age) | Male | 6.940 | 75.381 | <0.001 | Male |
| Tsimane | NLR | s(Age) | Postmenopausal | 2.036 | 2.460 | 0.057 | Postmenopausal |
| Tsimane | NLR | s(Age) | Postpartum | 1.056 | 0.057 | 0.921 | Postpartum |
| Tsimane | NLR | s(Age) | Premenarchal | 1.000 | 71.831 | <0.001 | Premenarchal |
| Tsimane | NLR | s(Age) | Pregnant | 2.289 | 5.299 | 0.003 | Pregnant |
| Tsimane | NLR | s(Parity) | Cycling | 1.560 | 0.318 | 0.683 | Cycling |
| Tsimane | NLR | s(Parity) | Postmenopausal | 5.706 | 2.466 | 0.040 | Postmenopausal |
| Tsimane | NLR | s(Parity) | Postpartum | 1.005 | 0.181 | 0.675 | Postpartum |
| Tsimane | NLR | s(Parity) | Pregnant | 1.003 | 0.034 | 0.860 | Pregnant |

Table S5. Model terms, statistics, and p-values for USA-specific models.

| Pop | Measure | Term | RepPhase | EDF | F-statistic | P-value | Sex:Reproductive Phase |
| --- | --- | --- | --- | --- | --- | --- | --- |
| USA | WBC | s(Age) | Cycling | 1.033 | 1.329 | 0.280 | Cycling |
| USA | WBC | s(Age) | Male | 7.720 | 13.372 | <0.001 | Male |
| USA | WBC | s(Age) | Postmenopausal | 1.030 | 15.805 | <0.001 | Postmenopausal |
| USA | WBC | s(Age) | Postpartum | 1.782 | 1.243 | 0.290 | Postpartum |
| USA | WBC | s(Age) | Premenarchal | 1.752 | 31.142 | <0.001 | Premenarchal |
| USA | WBC | s(Age) | Pregnant | 2.808 | 30.719 | <0.001 | Pregnant |
| USA | WBC | s(Parity) | Cycling | 1.303 | 0.881 | 0.250 | Cycling |
| USA | WBC | s(Parity) | Postmenopausal | 1.018 | 1.566 | 0.203 | Postmenopausal |
| USA | WBC | s(Parity) | Postpartum | 1.017 | 0.384 | 0.535 | Postpartum |
| USA | WBC | s(Parity) | Pregnant | 1.009 | 2.663 | 0.100 | Pregnant |
| USA | NEU | s(Age) | Cycling | 1.034 | 0.885 | 0.349 | Cycling |
| USA | NEU | s(Age) | Male | 5.858 | 29.561 | <0.001 | Male |
| USA | NEU | s(Age) | Postmenopausal | 3.471 | 6.091 | <0.001 | Postmenopausal |
| USA | NEU | s(Age) | Postpartum | 1.755 | 1.074 | 0.334 | Postpartum |
| USA | NEU | s(Age) | Premenarchal | 1.001 | 0.046 | 0.830 | Premenarchal |
| USA | NEU | s(Age) | Pregnant | 3.006 | 24.243 | <0.001 | Pregnant |
| USA | NEU | s(Parity) | Cycling | 1.047 | 0.073 | 0.817 | Cycling |
| USA | NEU | s(Parity) | Postmenopausal | 1.018 | 1.017 | 0.308 | Postmenopausal |
| USA | NEU | s(Parity) | Postpartum | 1.020 | 0.403 | 0.530 | Postpartum |
| USA | NEU | s(Parity) | Pregnant | 1.809 | 4.266 | 0.009 | Pregnant |
| USA | LYM | s(Age) | Cycling | 1.448 | 8.040 | <0.001 | Cycling |
| USA | LYM | s(Age) | Male | 8.145 | 129.186 | <0.001 | Male |
| USA | LYM | s(Age) | Postmenopausal | 2.634 | 7.178 | <0.001 | Postmenopausal |
| USA | LYM | s(Age) | Postpartum | 1.018 | 1.849 | 0.165 | Postpartum |
| USA | LYM | s(Age) | Premenarchal | 2.017 | 180.463 | <0.001 | Premenarchal |
| USA | LYM | s(Age) | Pregnant | 2.150 | 3.974 | 0.012 | Pregnant |
| USA | LYM | s(Parity) | Cycling | 1.004 | 0.267 | 0.607 | Cycling |
| USA | LYM | s(Parity) | Postmenopausal | 1.002 | 0.279 | 0.597 | Postmenopausal |
| USA | LYM | s(Parity) | Postpartum | 1.313 | 0.220 | 0.642 | Postpartum |
| USA | LYM | s(Parity) | Pregnant | 1.008 | 0.091 | 0.767 | Pregnant |
| USA | EOS | s(Age) | Cycling | 1.003 | 3.629 | 0.057 | Cycling |
| USA | EOS | s(Age) | Male | 3.010 | 17.847 | <0.001 | Male |
| USA | EOS | s(Age) | Postmenopausal | 1.008 | 0.298 | 0.592 | Postmenopausal |
| USA | EOS | s(Age) | Postpartum | 1.001 | 0.269 | 0.605 | Postpartum |
| USA | EOS | s(Age) | Premenarchal | 1.000 | 0.397 | 0.527 | Premenarchal |
| USA | EOS | s(Age) | Pregnant | 1.375 | 0.331 | 0.765 | Pregnant |
| USA | EOS | s(Parity) | Cycling | 1.018 | 0.050 | 0.846 | Cycling |
| USA | EOS | s(Parity) | Postmenopausal | 1.010 | 2.671 | 0.099 | Postmenopausal |
| USA | EOS | s(Parity) | Postpartum | 1.008 | 0.330 | 0.572 | Postpartum |
| USA | EOS | s(Parity) | Pregnant | 1.012 | 1.781 | 0.183 | Pregnant |
| USA | MON | s(Age) | Cycling | 3.894 | 3.438 | 0.006 | Cycling |
| USA | MON | s(Age) | Male | 7.274 | 12.806 | <0.001 | Male |
| USA | MON | s(Age) | Postmenopausal | 1.012 | 14.609 | <0.001 | Postmenopausal |
| USA | MON | s(Age) | Postpartum | 1.005 | 1.191 | 0.273 | Postpartum |
| USA | MON | s(Age) | Premenarchal | 1.909 | 10.863 | <0.001 | Premenarchal |
| USA | MON | s(Age) | Pregnant | 2.490 | 15.172 | <0.001 | Pregnant |
| USA | MON | s(Parity) | Cycling | 1.534 | 0.624 | 0.503 | Cycling |
| USA | MON | s(Parity) | Postmenopausal | 1.619 | 0.275 | 0.804 | Postmenopausal |
| USA | MON | s(Parity) | Postpartum | 1.003 | 0.089 | 0.770 | Postpartum |
| USA | MON | s(Parity) | Pregnant | 1.001 | 2.874 | 0.090 | Pregnant |
| USA | NLR | s(Age) | Cycling | 1.002 | 21.725 | <0.001 | Cycling |
| USA | NLR | s(Age) | Male | 5.660 | 123.834 | <0.001 | Male |
| USA | NLR | s(Age) | Postmenopausal | 3.898 | 9.403 | <0.001 | Postmenopausal |
| USA | NLR | s(Age) | Postpartum | 1.146 | 0.180 | 0.844 | Postpartum |
| USA | NLR | s(Age) | Premenarchal | 1.489 | 14.189 | <0.001 | Premenarchal |
| USA | NLR | s(Age) | Pregnant | 3.325 | 65.932 | <0.001 | Pregnant |
| USA | NLR | s(Parity) | Cycling | 1.909 | 0.813 | 0.585 | Cycling |
| USA | NLR | s(Parity) | Postmenopausal | 5.317 | 1.896 | 0.069 | Postmenopausal |
| USA | NLR | s(Parity) | Postpartum | 1.003 | 1.116 | 0.291 | Postpartum |
| USA | NLR | s(Parity) | Pregnant | 1.019 | 20.734 | <0.001 | Pregnant |
